# Supplementary material for: Efficacy of corrosion control and pipe replacement in reducing citywide lead exposure during the Flint, MI water system recovery
Source: Royal Society of Chemistry journal article supplement (doi:10.1039/d0ew00583e), 2020-01-01
Supplement: d0ew00583e1.pdf [file d0ew00583e1.pdf]

1

*Electronic Supplementary Information*

2

**Efficacy of Corrosion Control and Pipe Replacement in Reducing Citywide Lead**

3

**Exposure during the Flint, MI Water System Recovery**

4

5

Siddhartha Roy,<sup>1\*</sup> and Marc Edwards,<sup>1</sup>

6

<sup>1</sup>Department of Civil and Environmental Engineering, Virginia Tech

7

418 Durham Hall, 1145 Perry St.

8

Blacksburg, VA 24061, USA

9

10

\* Corresponding author, Siddhartha Roy, email [sidroy@vt.edu](mailto:sidroy@vt.edu)

11

12

13 **Text S1.** Estimating percentage of biosolids lead that will continue to be released from  
 14 indoor plumbing (16-28%) and composite 90<sup>th</sup> percentile water lead levels (or, WLL90)  
 15 (5.3-7.4 µg/L) after Flint replaces all lead and galvanized service lines by late 2020.

16 Equation 1:  $Biosolids-Pb = (\% \text{ services remaining}) \times Pb_{services} + Pb_{indoor} +$   
 17  $Pb_{other}$

18 **A.** We use the following equation from Roy et al., 2019 that relies on composite  
 19 water lead levels from first and second draws:<sup>1</sup>

20 Equation 2:  $Biosolids-Pb \text{ (kg)} = 0.37 \times WLL90 \text{ (}\mu\text{g/L)} + 1.41$ , where  
 21  $WLL90 = \frac{1}{2} \times \text{first draw} + \frac{1}{2} \times \text{second draw}$  (Equation 2A)

| Var.     | Year                                                                                                                                                                                                                                                                                                                                                                                                                                                   | 2013  | 2017  | 2018  |
|----------|--------------------------------------------------------------------------------------------------------------------------------------------------------------------------------------------------------------------------------------------------------------------------------------------------------------------------------------------------------------------------------------------------------------------------------------------------------|-------|-------|-------|
| <b>A</b> | <b>Total Biosolids-Pb (kg)</b>                                                                                                                                                                                                                                                                                                                                                                                                                         | 117.7 | 77.6  | 72.9  |
| <b>B</b> | <b>% services remaining</b>                                                                                                                                                                                                                                                                                                                                                                                                                            | 100%  | 48%   | 34%   |
|          | • <i>Solving Equation 1 for both 2017 and 2018 against 2013 data</i>                                                                                                                                                                                                                                                                                                                                                                                   |       |       |       |
| <b>C</b> | <b>Pb<sub>services</sub> (kg)</b>                                                                                                                                                                                                                                                                                                                                                                                                                      | --    | 77.1  | 67.9  |
| <b>D</b> | <b>Pb<sub>indoor</sub> + Pb<sub>other</sub> (kg)</b>                                                                                                                                                                                                                                                                                                                                                                                                   | --    | 40.6  | 49.8  |
| <b>E</b> | <b>Pb<sub>other</sub> (kg) for full year = 1.41 x 12 = 16.9 kg</b> (from Equation 2)                                                                                                                                                                                                                                                                                                                                                                   |       |       |       |
| <b>F</b> | <b>Pb<sub>indoor</sub> (kg) = D – E</b>                                                                                                                                                                                                                                                                                                                                                                                                                | --    | 23.7  | 32.9  |
| <b>G</b> | <b>Percentage of Biosolids-Pb from plumbing = Pb<sub>indoor</sub> / Total Biosolids-Pb or (F / A)</b>                                                                                                                                                                                                                                                                                                                                                  | --    | 20.1% | 28.0% |
|          | <ul style="list-style-type: none"> <li>• <i>Assuming Flint replaces all service lines by end of 2020, % of pipes in system = 0%.</i></li> <li>• <i>Therefore, Total Biosolids-Pb = Pb<sub>indoor</sub> + Pb<sub>other</sub> (Equation 3)</i></li> <li>• <i>Dividing Equation 3 by 12 months to get Biosolids-Pb/month, substituting Equation 3 in Equation 1: Pb<sub>plumbing+other</sub> = 0.37 x WLL90 + 1.41, and solving for WLL90.</i></li> </ul> |       |       |       |
| <b>H</b> | <b>WLL90 (µg/L)</b>                                                                                                                                                                                                                                                                                                                                                                                                                                    | --    | 5.3   | 7.4   |
| <b>I</b> | <b>Percentage WLL90 reduction against worst 3 FWC months (40.5 µg/L)</b>                                                                                                                                                                                                                                                                                                                                                                               | --    | 86.9% | 81.7% |
| <b>J</b> | <b>Percentage WLL90 reduction against pre-FWC year of 2013 (22.7 µg/L)</b>                                                                                                                                                                                                                                                                                                                                                                             | --    | 76.7% | 67.4% |

22 **II.** We also use the following equation from Roy et al., 2019 that relies on  
 23 composite water lead levels from first, second, and third draws:<sup>1</sup>

24 Equation 4:  $Biosolids-Pb \text{ (kg/month)} = 0.483 \times WLL90 \text{ (}\mu\text{g/L)} + 1.79$ ,  
 25 where  $WLL90 = 1/3 \times \text{first draw} + 1/3 \text{ second draw} + 1/3 \text{ third draw}$   
 26 (Equation 4A)

| Var. | Year                                                                                                  | 2013  | 2017  | 2018  |
|------|-------------------------------------------------------------------------------------------------------|-------|-------|-------|
| A    | <b>Total Biosolids-Pb (kg)</b>                                                                        | 117.7 | 77.6  | 72.9  |
| B    | <b>% services remaining</b>                                                                           | 100%  | 48%   | 34%   |
|      | • Solving Equation 2 for both 2017 and 2018 against 2013 data                                         |       |       |       |
| C    | <b>Pb<sub>services</sub> (kg)</b>                                                                     | --    | 77.1  | 67.9  |
| D    | <b>Pb<sub>indoor</sub> + Pb<sub>other</sub> (kg)</b>                                                  | --    | 40.6  | 49.8  |
| E    | <b>Pb<sub>other</sub> (kg) for full year = 1.79 x 12 = 21.5 kg (from Equation 2)</b>                  |       |       |       |
| F    | <b>Pb<sub>indoor</sub> (kg) = D – E</b>                                                               | --    | 19.1  | 28.3  |
| G    | <b>Percentage of Biosolids-Pb from plumbing = Pb<sub>indoor</sub> / Total Biosolids-Pb or (F / A)</b> | --    | 16.2% | 24.1% |

27

28 *Text S1 References:*

- 29 1. S. Roy, S., M. Tang and M. A. Edwards, Lead release to potable water during the  
 30 Flint, Michigan water crisis as revealed by routine biosolids monitoring data,  
 31 *Water Res.*, 2019, **160**, 475-483.

32

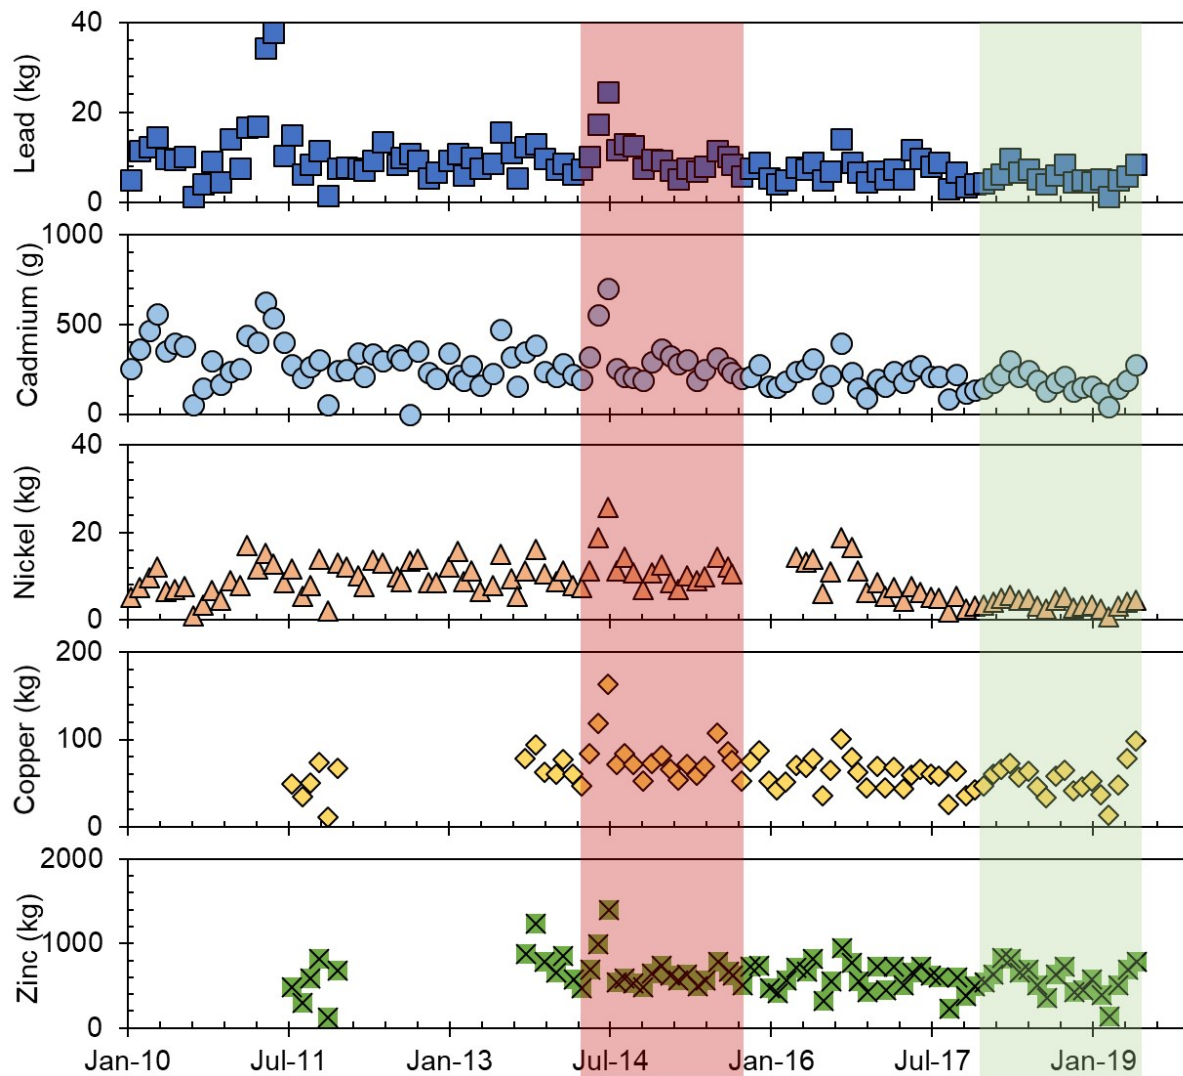

33

34 **Figure S1.** Monthly cumulative lead, cadmium, nickel, copper and zinc mass in  
 35 biosolids (kg) during Jan 2010-Jun 2019. The red and green highlighted areas denotes  
 36 biosolids metal levels during the 18 months of the Flint Water Crisis (April 2014-October  
 37 2015) and the most recent 18 month time period for which data is available (January  
 38 2018-June 2019).

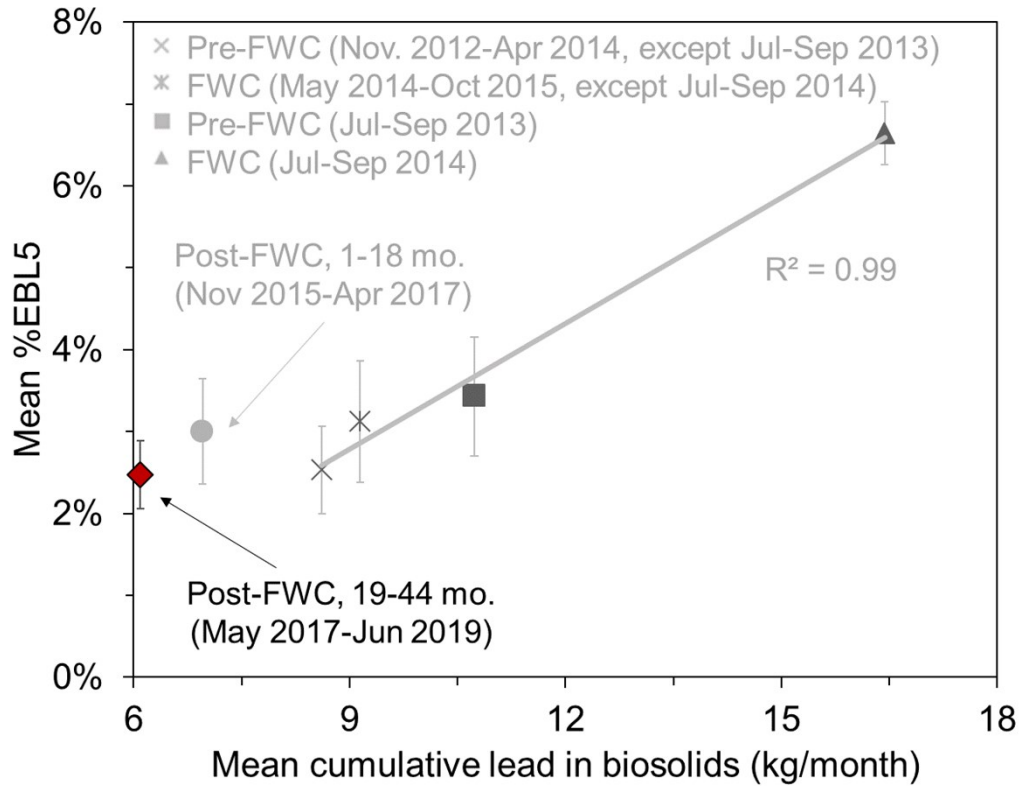

39

40 **Figure S2.** The latest post-FWC results of mean cumulative lead mass in biosolids  
 41 (kg/month) and mean %EBL5 for May 2017-Jun 2019 (highlighted) are overlaid on the  
 42 grayscale graph from Roy et al. 2019 described thus: Mean cumulative lead mass in  
 43 biosolids (kg/month) correlated with mean %EBL5 for four time intervals pre- and during  
 44 FWC ( $R^2 = 0.99$ ,  $p < 0.05$ ). Error bars indicate 95% confidence intervals for %EBL5. Due  
 45 to water protective measures and a dramatic increase in EBL testing frequency by  
 46 Federal Emergency Management Agency (FEMA), the post-FWC result is excluded  
 47 from the regression.

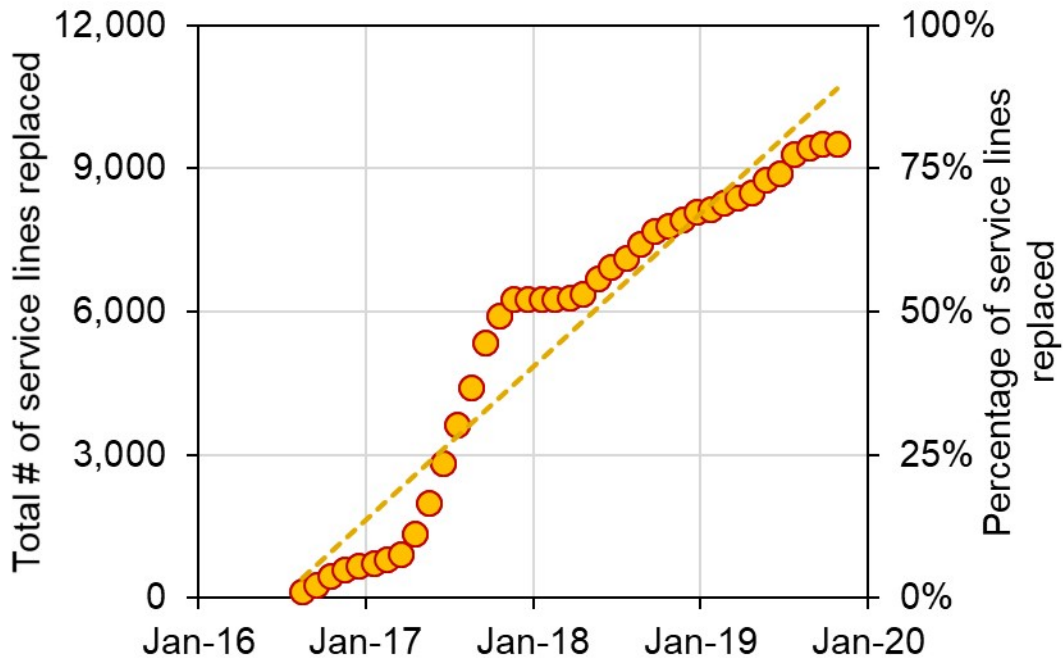

48

49 **Figure S3.** Total number and percentage of lead and galvanized iron service lines  
 50 replaced in the City of Flint, 2016-19 (Data courtesy: Eric Schwartz [University of  
 51 Michigan, Ann Arbor] and Jared Webb [BlueConduit]).

52 **Table S1.** Coefficient of determination ( $R^2$ ) between plumbing-related metals mass  
53 measured in biosolids for January 2018-June 2019.

| <b>Metals</b>    | <b>R<sup>2</sup></b> | <b>p-value</b> |
|------------------|----------------------|----------------|
| <i>Pb vs. Cu</i> | 0.01957              | 0.5798         |
| <i>Pb vs. Zn</i> | 0.007                | 0.7348         |
| <i>Cu vs. Zn</i> | 0.3033               | 0.0178         |

54

55 **Table S2.** Reductions in mean WLLs between the July 2016 and August 2017 water  
 56 sampling rounds in Flint homes (n=138) with enhanced corrosion control when  
 57 approximately 30% (3,624) of lead and galvanized iron pipes had been replaced.

| <b>Sample \ Test Round</b>                                          | <b>July 2016</b> | <b>August 2017</b> | <b>% WLL reduction</b> |
|---------------------------------------------------------------------|------------------|--------------------|------------------------|
| <i>First Draw</i>                                                   | 9.6              | 9                  | 5.8%                   |
| <i>Second Draw</i>                                                  | 3.0              | 2.1                | 30.1%                  |
| <i>Third Draw</i>                                                   | 2.4              | 1.8                | 23.7%                  |
| <i>Composite WLL =<br/>1/2 x first draw +<br/>1/2 x second draw</i> | 6.3              | 5.6                | 12.0%                  |

58

59

...
